# Supplementary material
Source: PubMed Central journal article supplement (PMC10492024)
Supplement: mmc1.pdf [file mmc1.pdf]

## **Supplemental Information**

### **Increased expression or activation of TRPML1 reduces hepatic storage of toxic Z alpha-1 antitrypsin**

**Nunzia Pastore, Francesco Annunziata, Rita Colonna, Veronica Maffia, Teresa Giuliano, Bruno Maria Custode, Bernadette Lombardi, Elena Polishchuk, Vincenzo Cacace, Lucia De Stefano, Edoardo Nusco, Nicolina Cristina Sorrentino, Pasquale Piccolo, and Nicola Brunetti-Pierri**

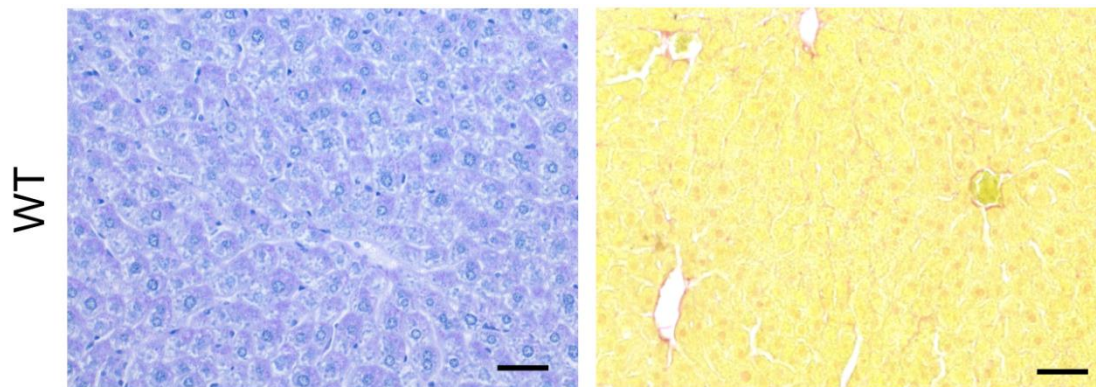

**Figure S1. PAS staining and Sirius red in wild-type mice.**

Liver PAS-D (left panel) and Sirius Red (right panel) stainings of C57BL/6 wild-type (WT) mice of 13 weeks of age.

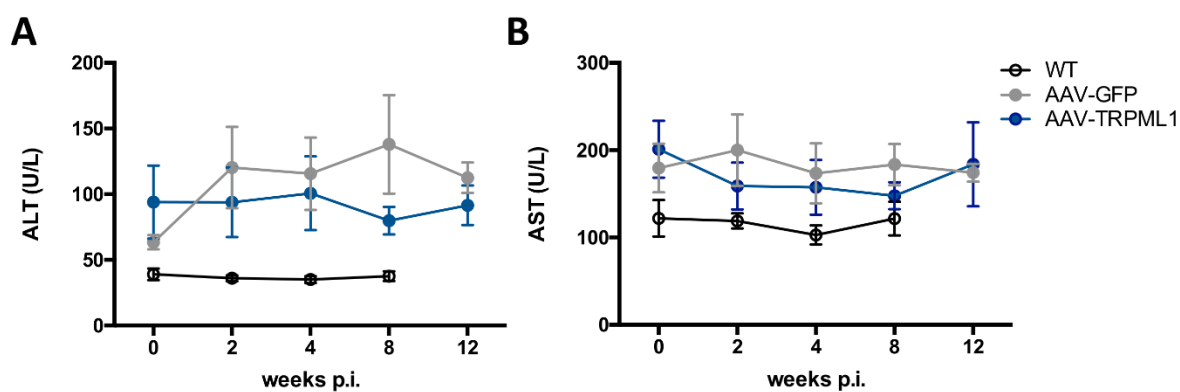

**Figure S2. Hepatic *TRPML1* gene transfer is not associated with increases in transaminases.**

Serum activities of ALT (**A**) and AST (**B**) in PiZ mice injected with AAV-GFP or AAV-TRPML1 (n=7 per group). Control wild-type (WT) mice (n=4) are also shown. Data are shown as mean  $\pm$  standard error.

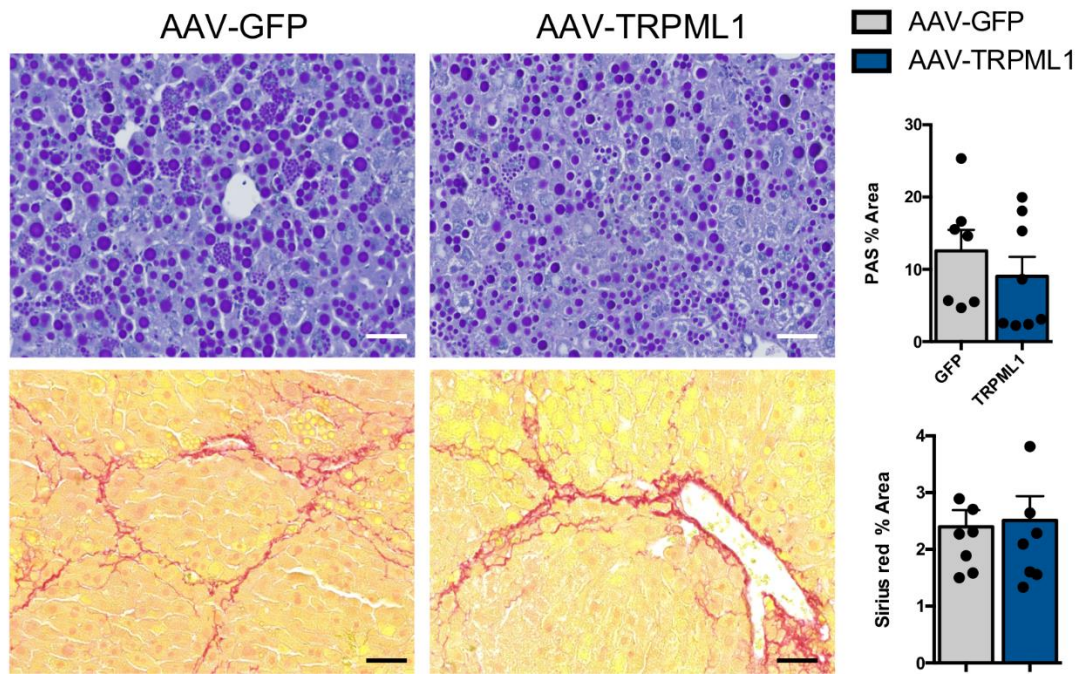

**Figure S3. Hepatic *TRPML1* gene transfer in 16-week-old PiZ mice.**

Liver PAS-D (upper panels) and Sirius Red (lower panels) stainings of PiZ mice injected at 16-weeks of age and analyzed 12-weeks post-injection with relative quantifications (n=7 AAV-GFP, n=8 AAV-TRPML1). Data are shown as mean  $\pm$  standard error.

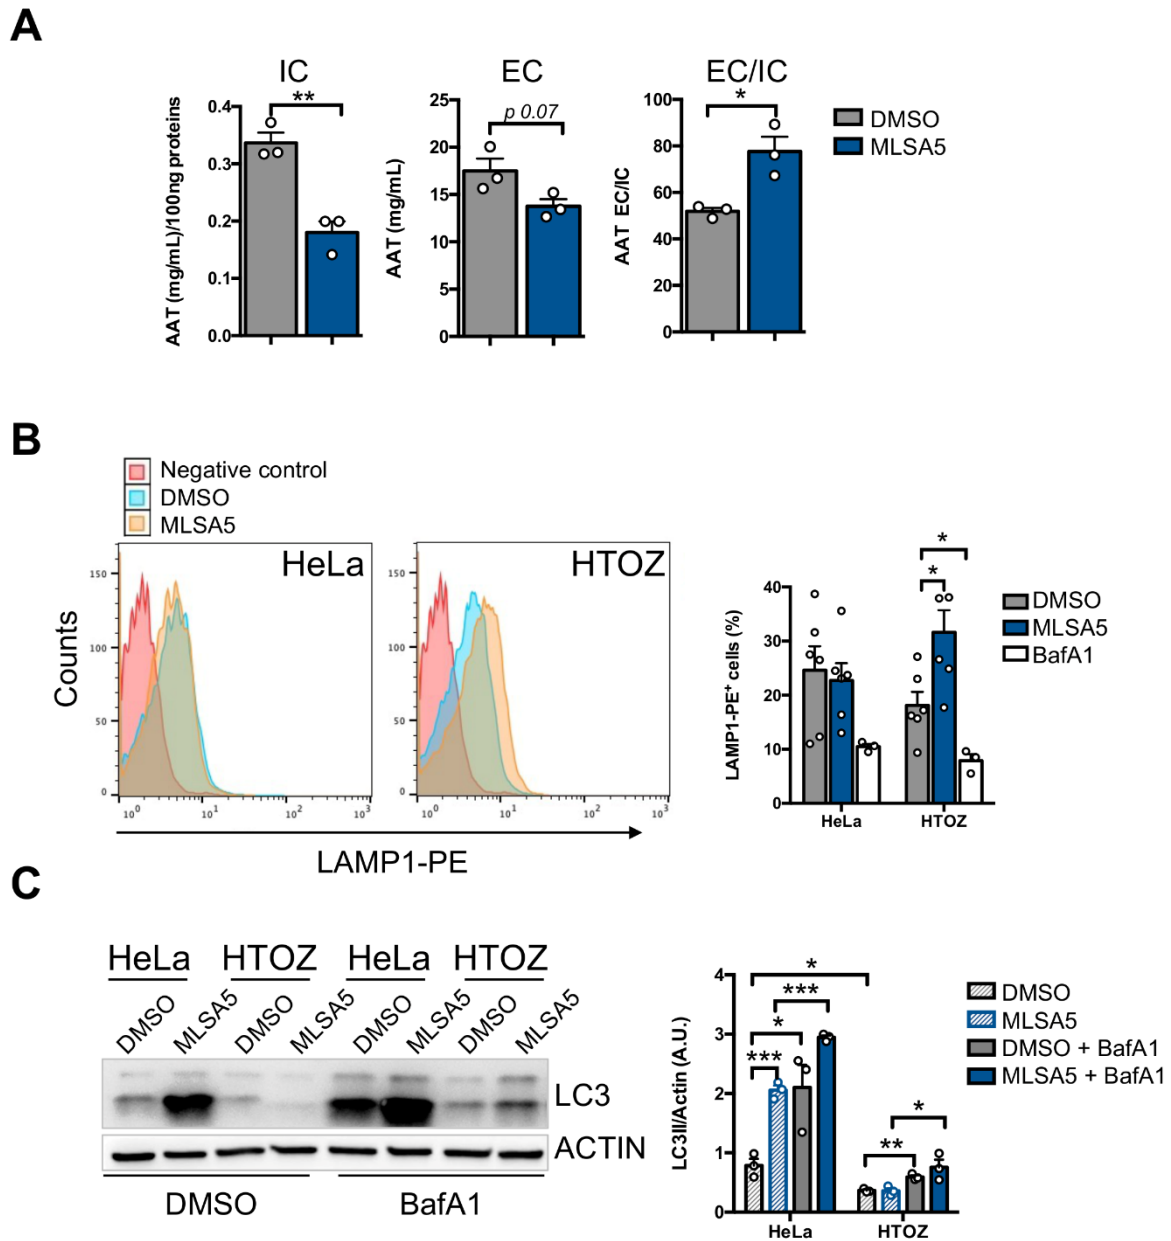

**Figure S4. Activation of TRPML1 induces release of AAT in the media.**

**A.** Intracellular (IC), extracellular (EC) and EC/IC ratio of AAT in HTO/Z cells treated with 10  $\mu$ M ML-SA5 for 24 hours ( $n=3$  per group). **B.** FACS analysis for LAMP1 on the plasma membrane of HeLa and H/TOZ cells incubated with 10  $\mu$ M ML-SA5 for 30 minutes and relative quantifications ( $n=6$  for DMSO,  $n=5$  for ML-SA5,  $n=3$  for BafilomycinA1-treated cells). **C.** Representative immunoblots for LC3 in HeLa and HTO/Z cells treated with 10  $\mu$ M ML-SA5 for 24 hours and relative quantifications ( $n=3$  per group). Cells were treated with BafilomycinA1 or DMSO for 4 hours before harvesting. Data are shown as mean  $\pm$  standard error. Student's *t*-test: \* $p$ -value < 0.05; \*\* $p$ -value < 0.01; \*\*\* $p$ -value < 0.001. Abbreviations: BafA1=BafilomycinA1; IC= Intracellular; EC= extracellular.

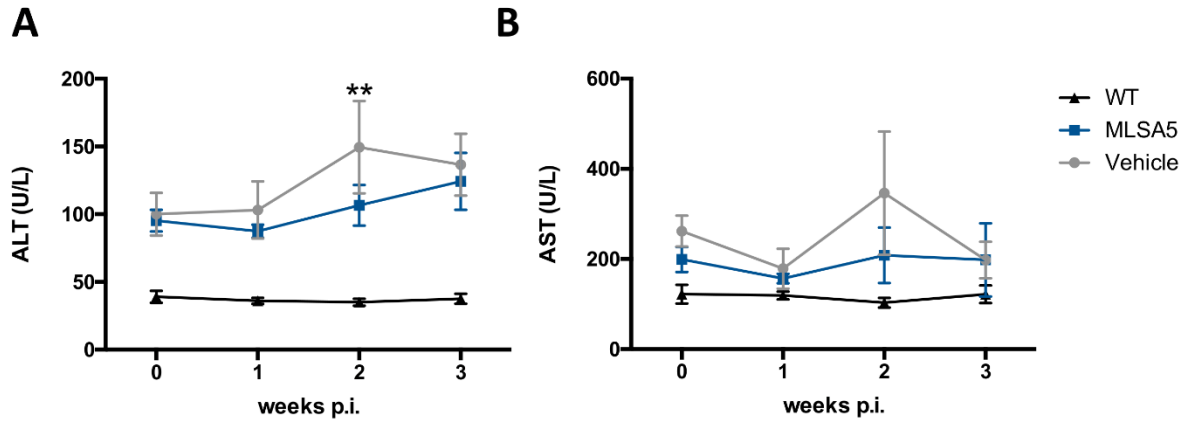

**Figure S5. Pharmacological activation of TRPML1 by ML-SA5 is not associated with an increase in transaminases.**

Serum activities of ALT and AST in PiZ mice treated with vehicle or ML-SA5 (n=7 per group). Control wild-type (WT) mice (n=4; the same shown in Fig. EV1) are also shown. Data are shown as mean  $\pm$  standard error. Student's *t*-test: \*\*p-value < 0.01.

**Table S1.** Primary antibodies used for immunoblots and stainings.

| Antigen           | Species in which the Ab was raised | Source         | Code       |
|-------------------|------------------------------------|----------------|------------|
| AAT               | Rabbit                             | Dako           | A0012      |
| AAT polymer (2C1) | Mouse                              | Hycult biotech | HYC-HM2289 |
| $\beta$ -actin    | Mouse                              | Invitrogen     | AM4302     |
| GAPDH             | Mouse                              | Santa Cruz     | sc-32233   |
| P62/SQSTM1        | Mouse                              | Abnova         | H00008878  |
| LAMP1             | Rat                                | Santa Cruz     | sc19992    |
| Laminin2          | Rat                                | Sigma-Aldrich  | L0663      |
| Na-K ATPase       | Rabbit                             | Abcam          | ab7671     |
| TFEB              | Rabbit                             | Bethyl         | A303-673A  |
| H3                | Rabbit                             | Cell Signaling | 9715       |
| LC3               | Rabbit                             | Cell Signaling | 2978       |
| Myc-Tag           | Rabbit                             | Cell signaling | 2278       |
| LAMP1-PE          | Rat                                | Invitrogen     | 12-1071-82 |

**Table S2.** Primers for real time PCR.

| Gene                       | Species |         | Sequence (5' → 3')     |
|----------------------------|---------|---------|------------------------|
| <i>TRPML1</i>              | mouse   | forward | CTGACCCCAATCCTGGGTAT   |
|                            |         | reverse | GGCCCGGAACCTTGTCACAT   |
| <i>TRPML1</i>              | human   | forward | GAGTCCCTGCGACAAGTTTC   |
|                            |         | reverse | TGTTCTTCCCGGAATGTC     |
| <i>Beta2 microglobulin</i> | mouse   | forward | TGGTGCTTGTCTCACTGACC   |
|                            |         | reverse | GTATGTTCCGGCTTCCCATTTC |
